# Supplementary material for: Vernal Pool Amphibian Inventories in the Temperate Forests of Eastern North America: Can Environmental DNA Replace the Traditional Methods?
Source: MDPI journal article supplement (doi:10.3390/f14101930), 2023-09-22

Figure S1: zOTUs accumulation curves of the merged CO1 metabarcodes (176 and 455) by number of processed filters. zOTUs were merged at the species level. Transparent areas correspond to the 95% confidence interval, estimated from 1000 random permutations. The dashed line represents the total number of Amphibia species detected using eDNA metabarcoding.

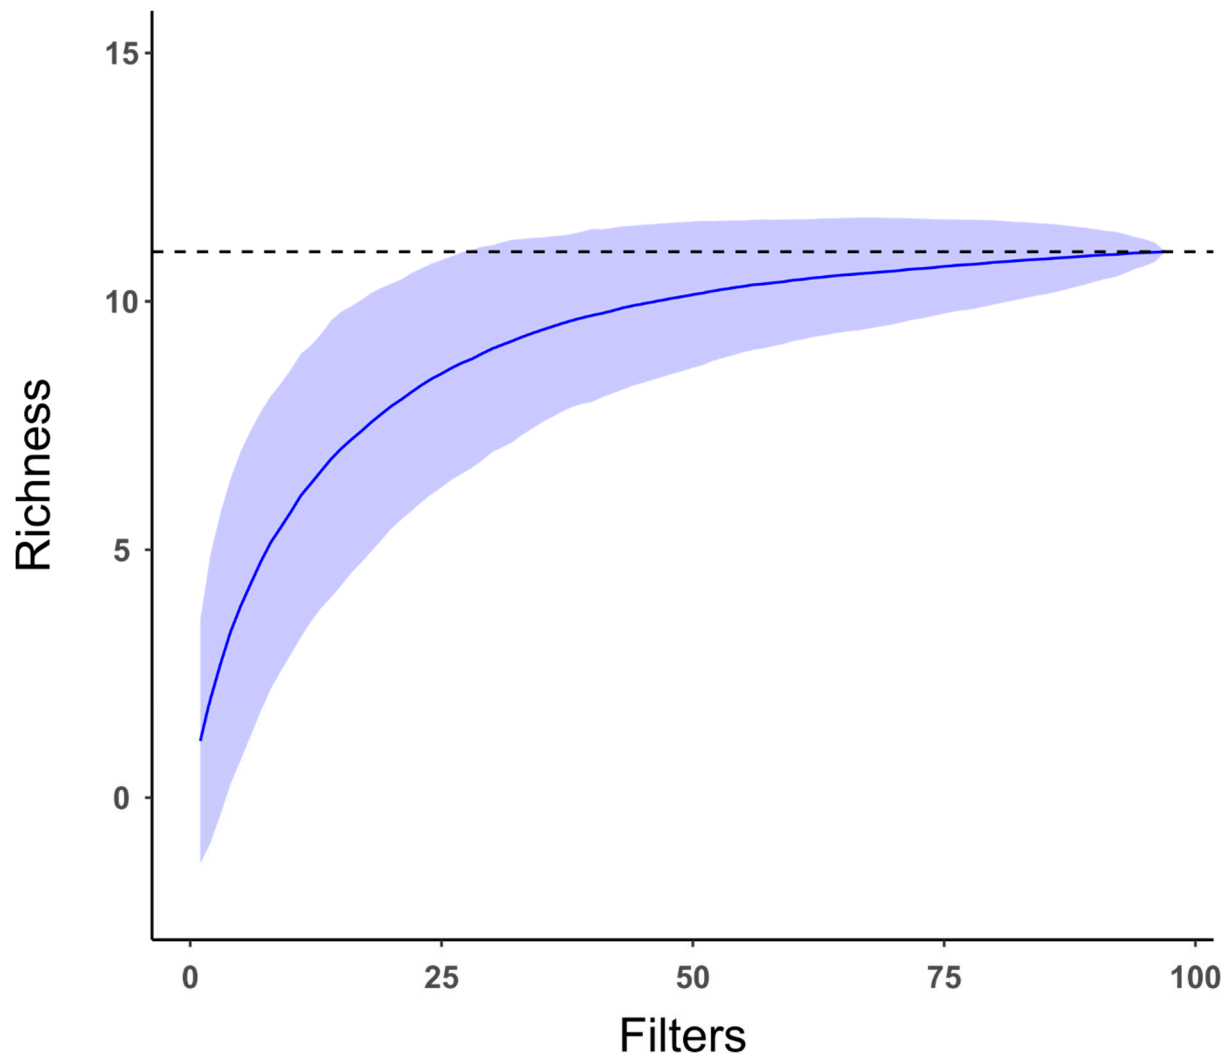

Supplement: s1 [file s1]
